# Supplementary material
Source: PubMed Central journal article supplement (PMC7572841)

Supplementary Figure 1.

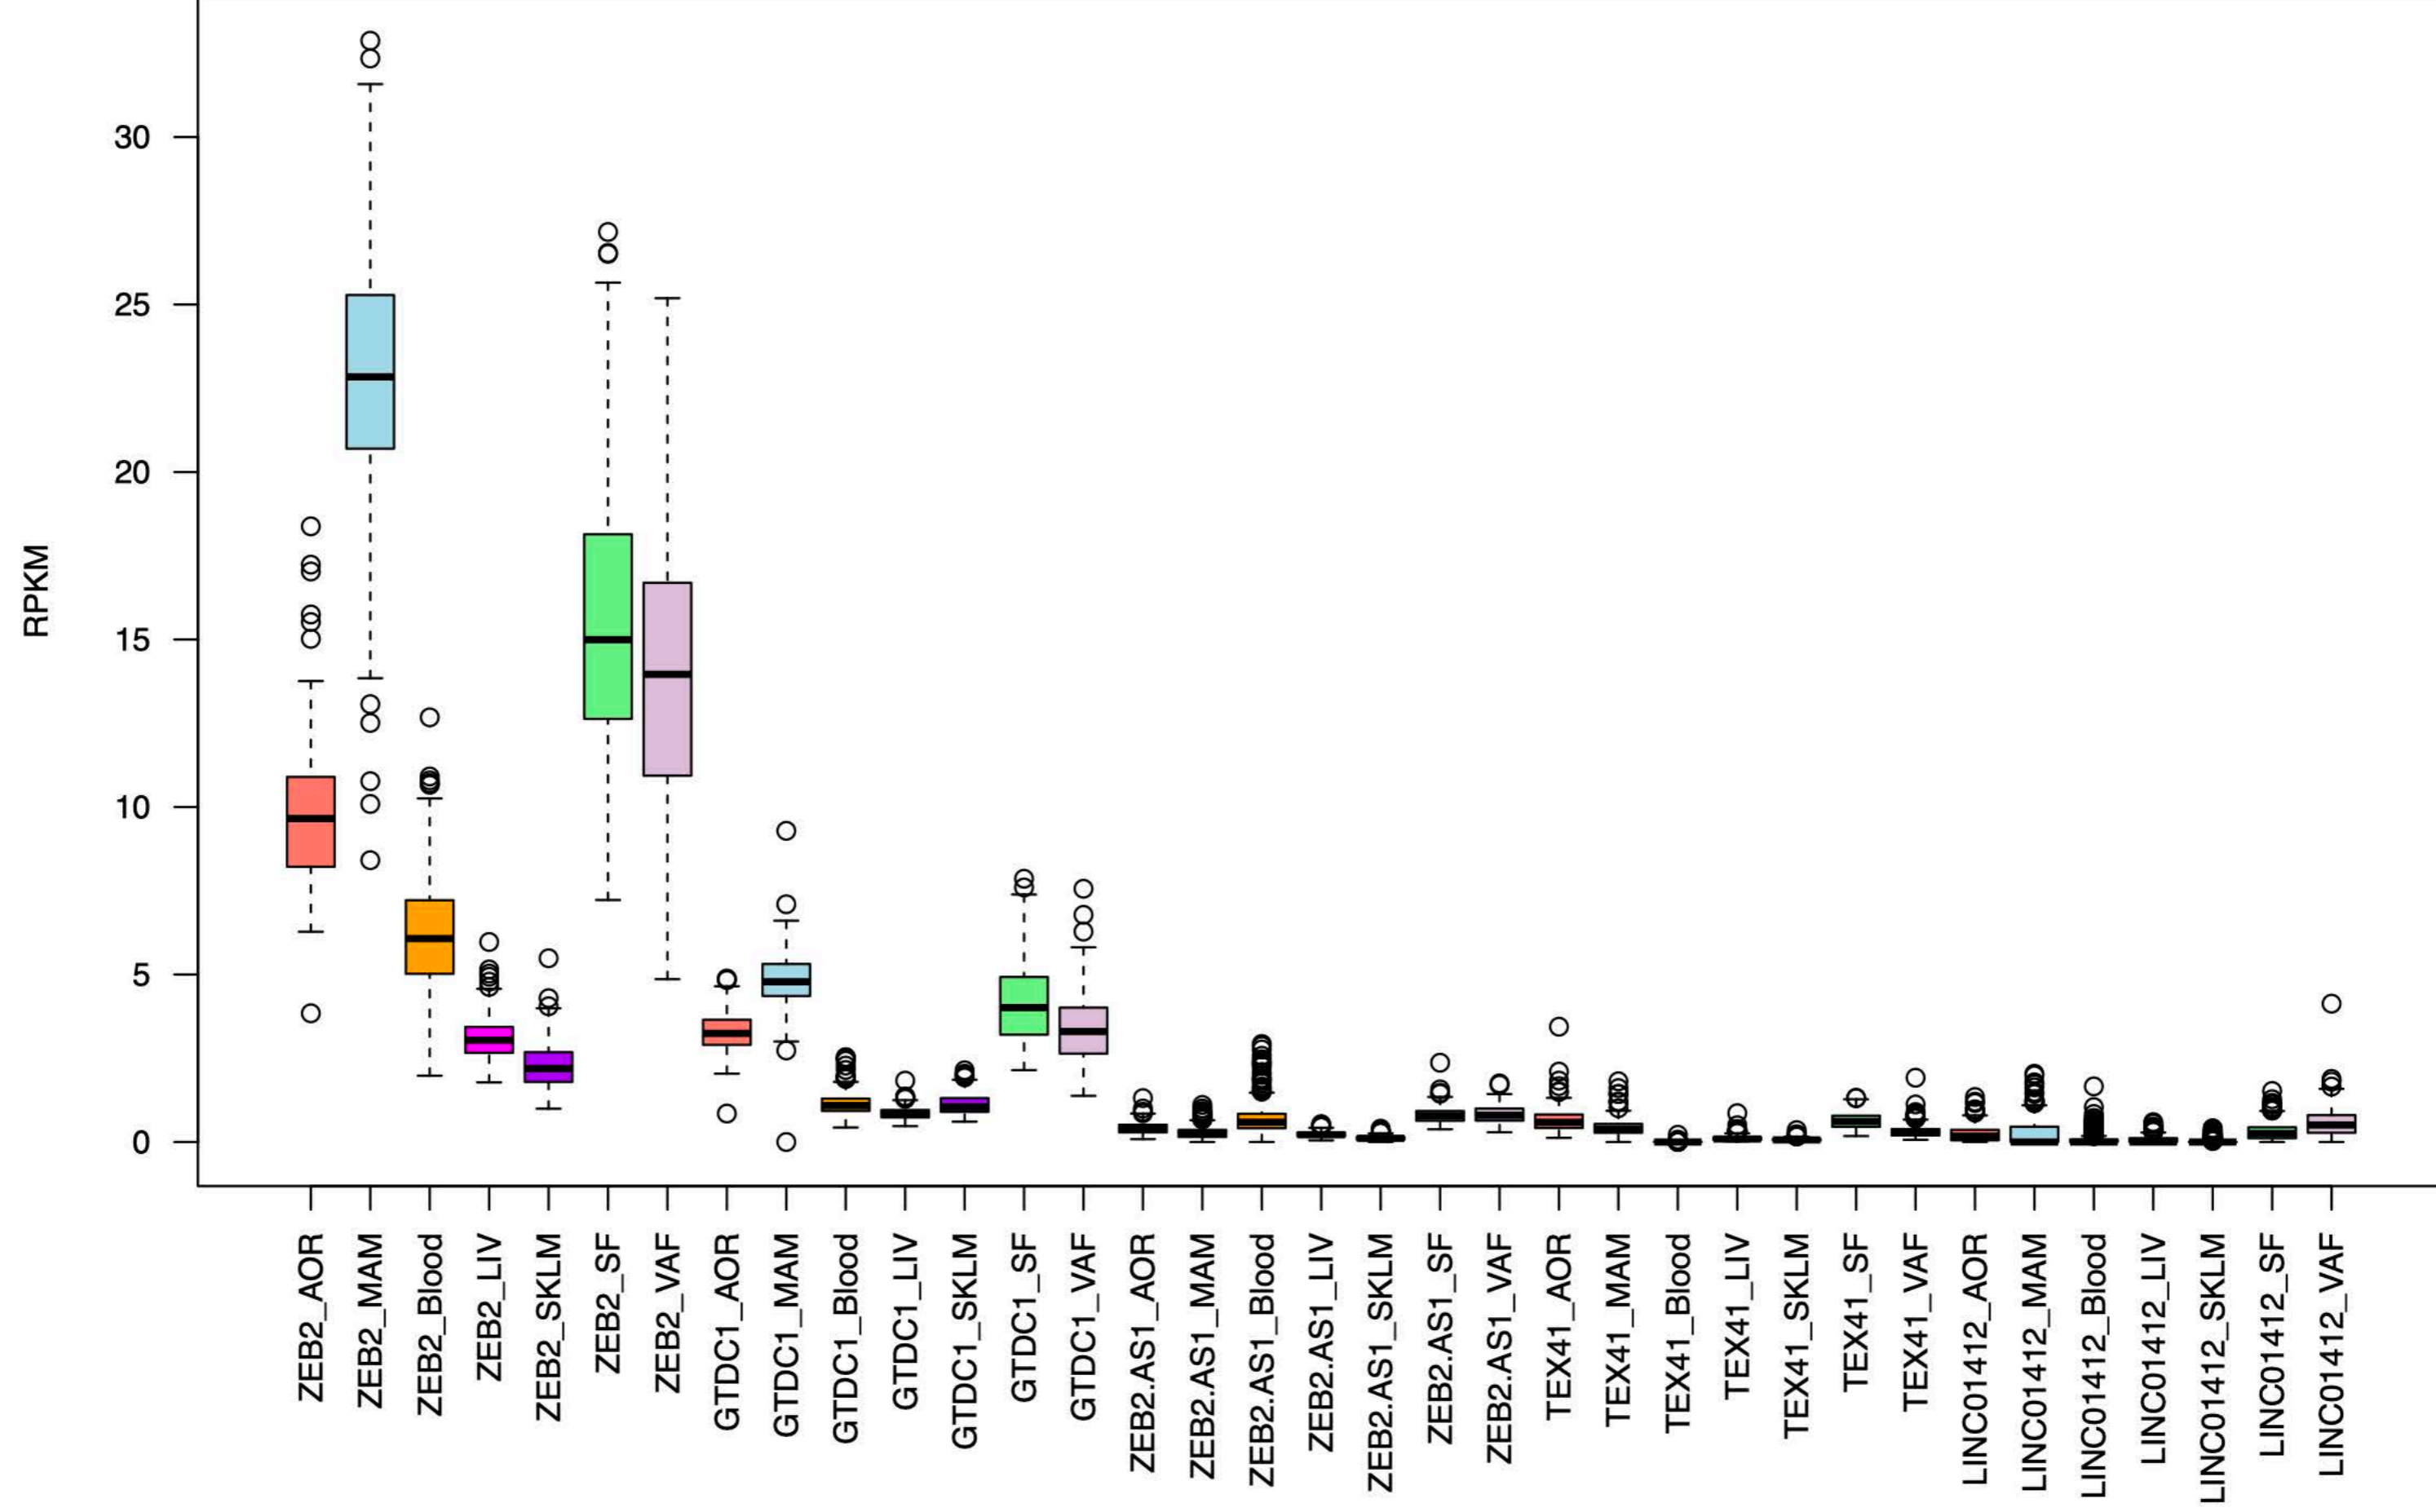

Supplementary Figure 2.

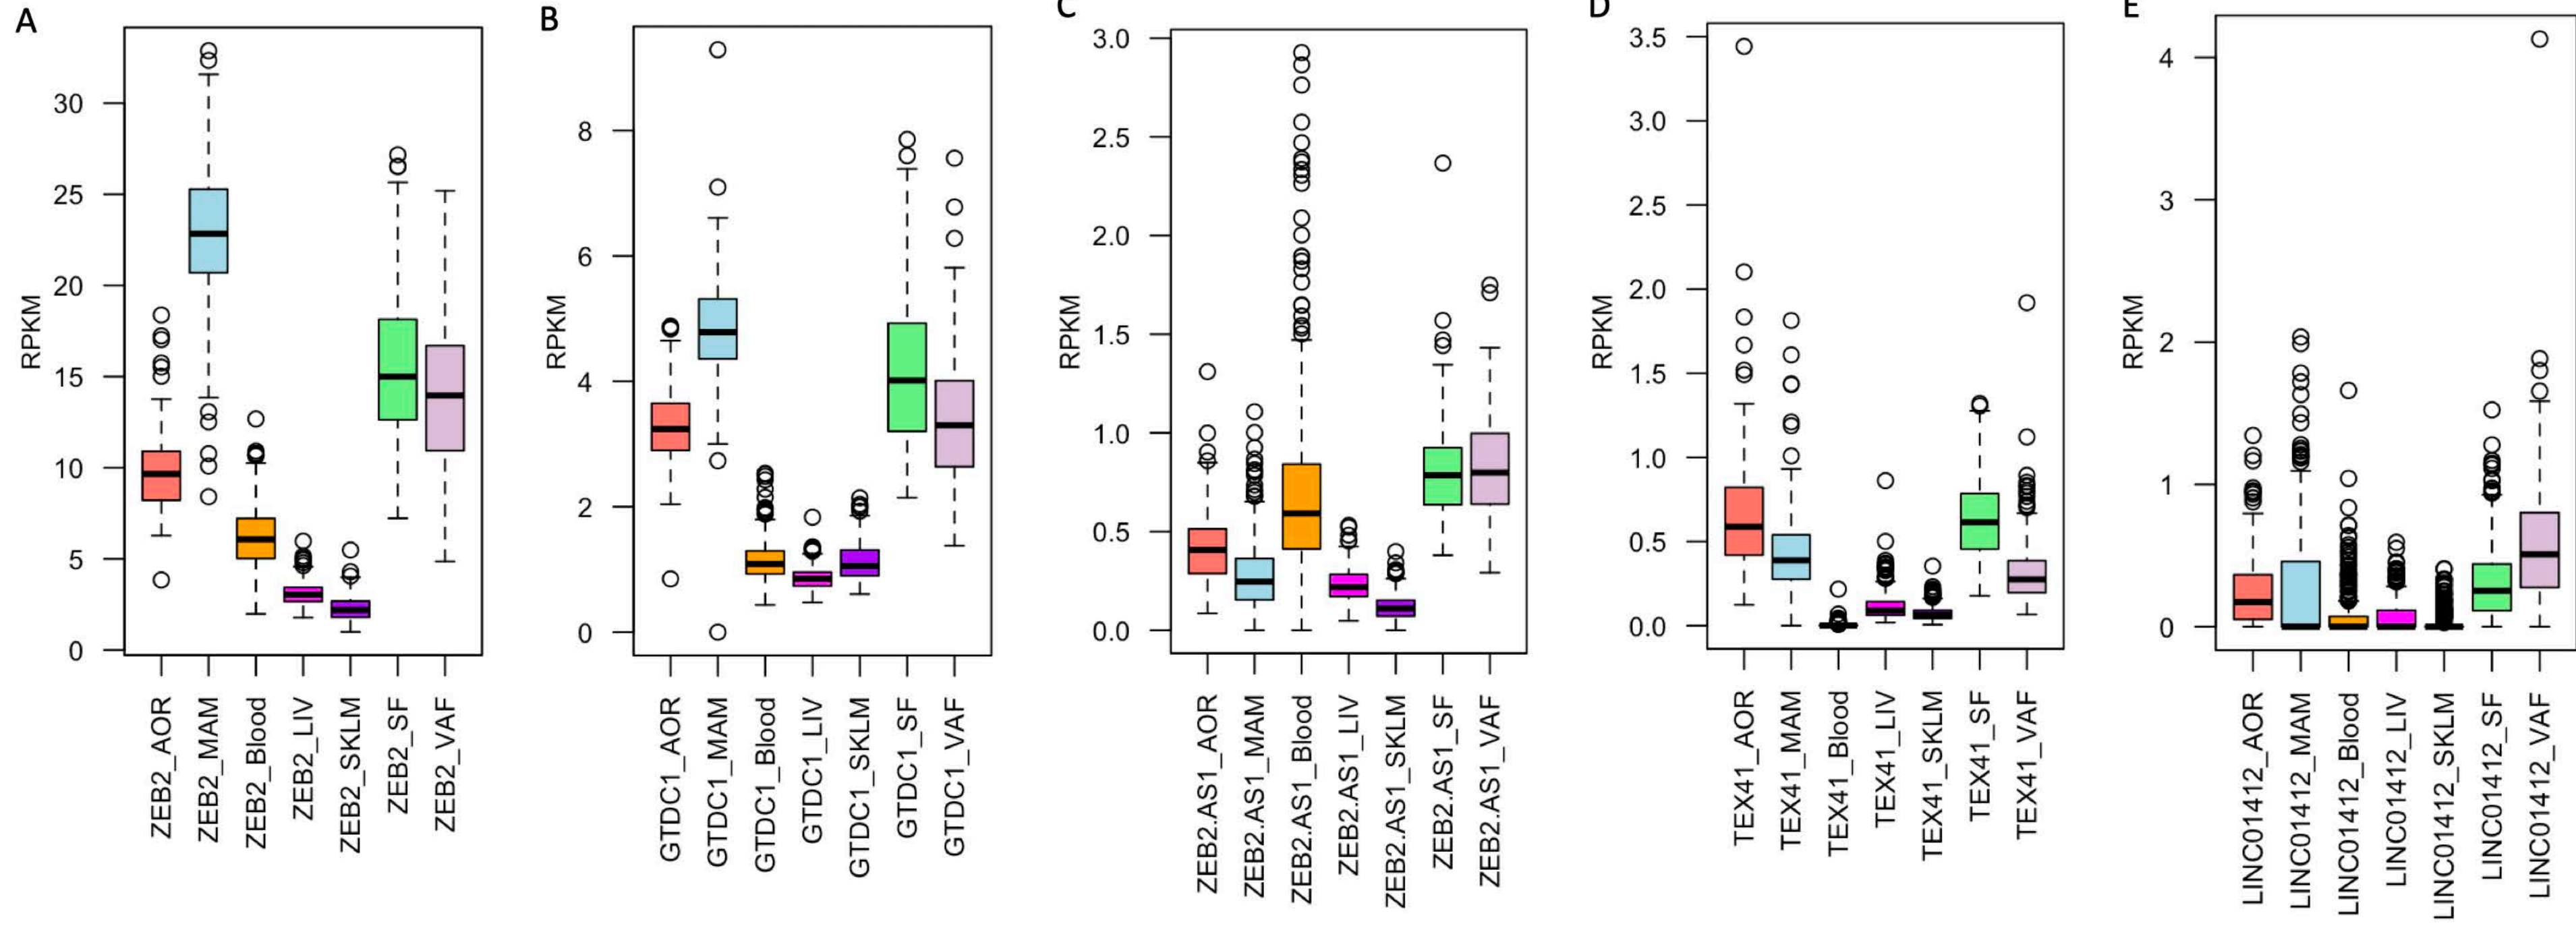

Supplementary Figure 3.

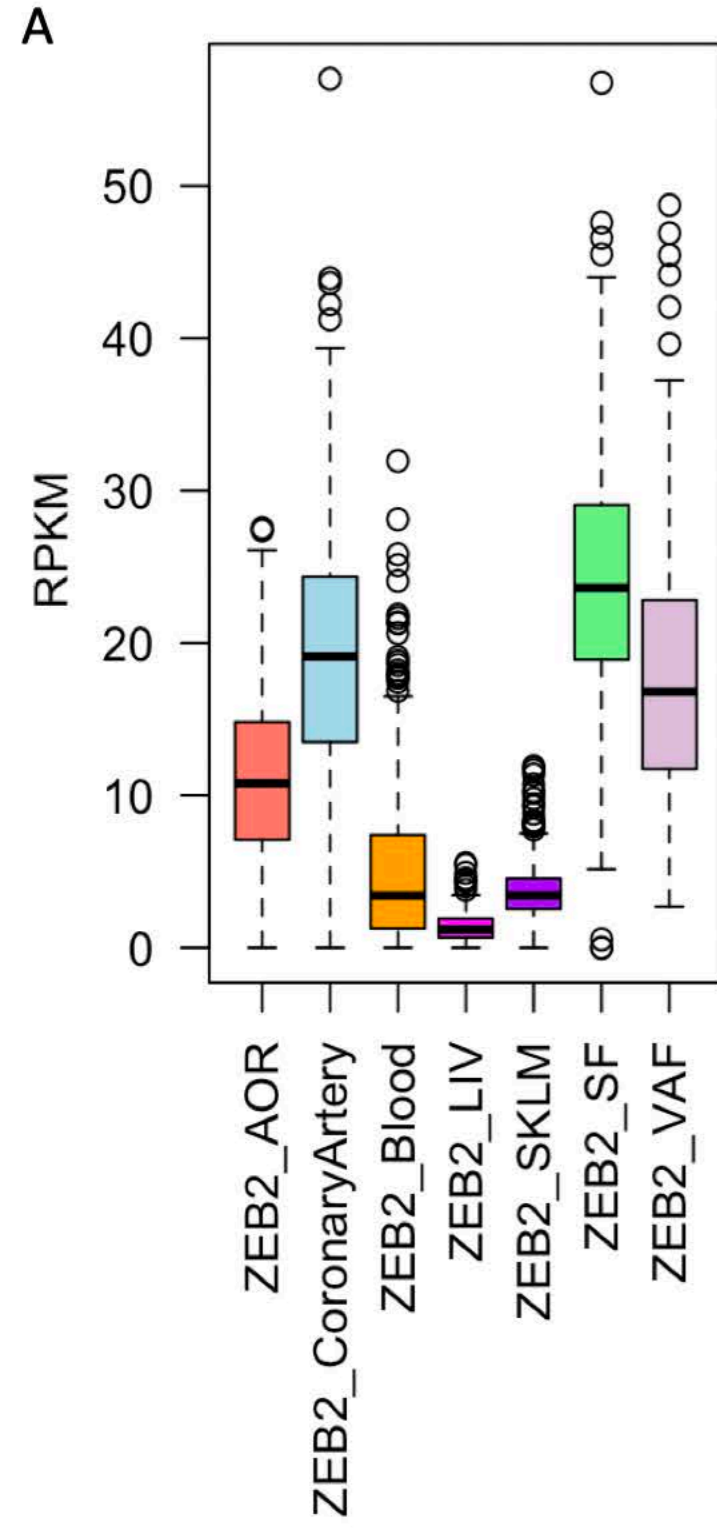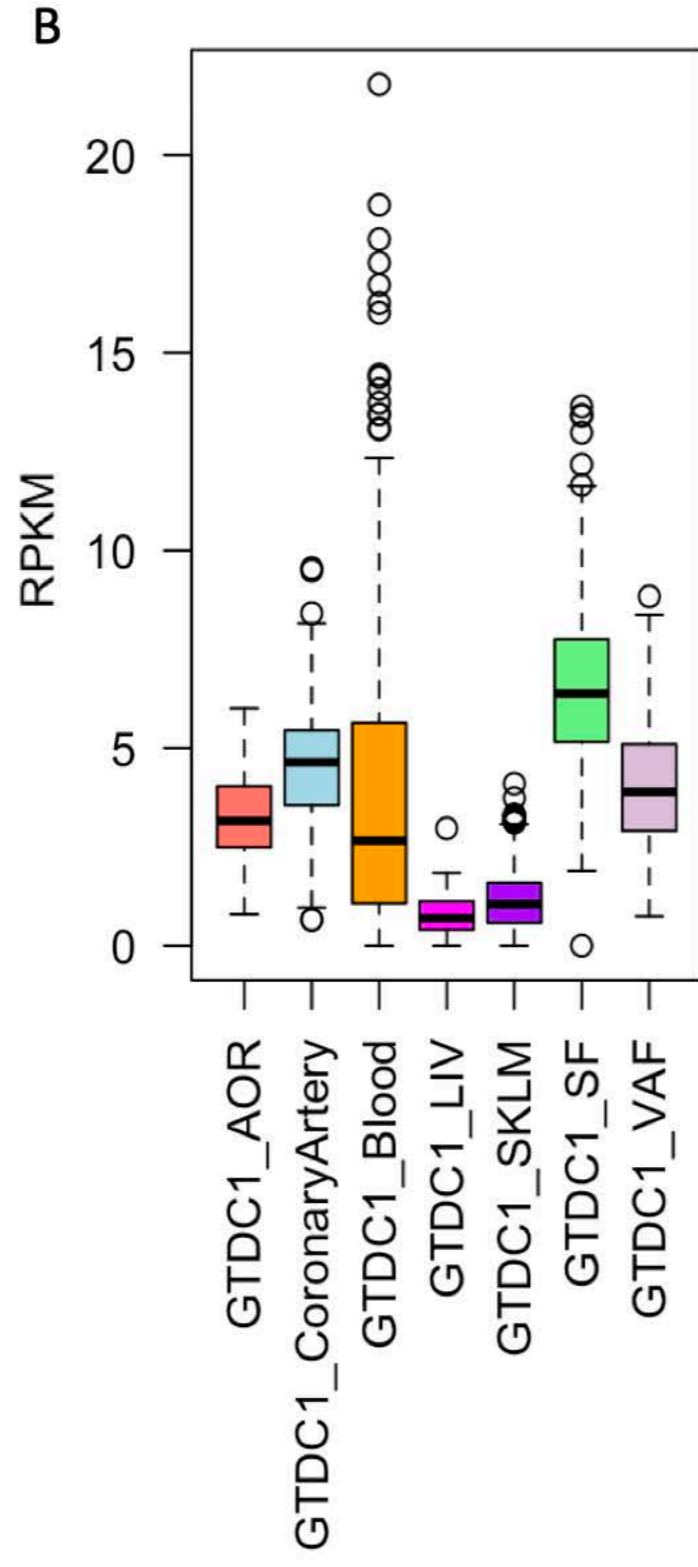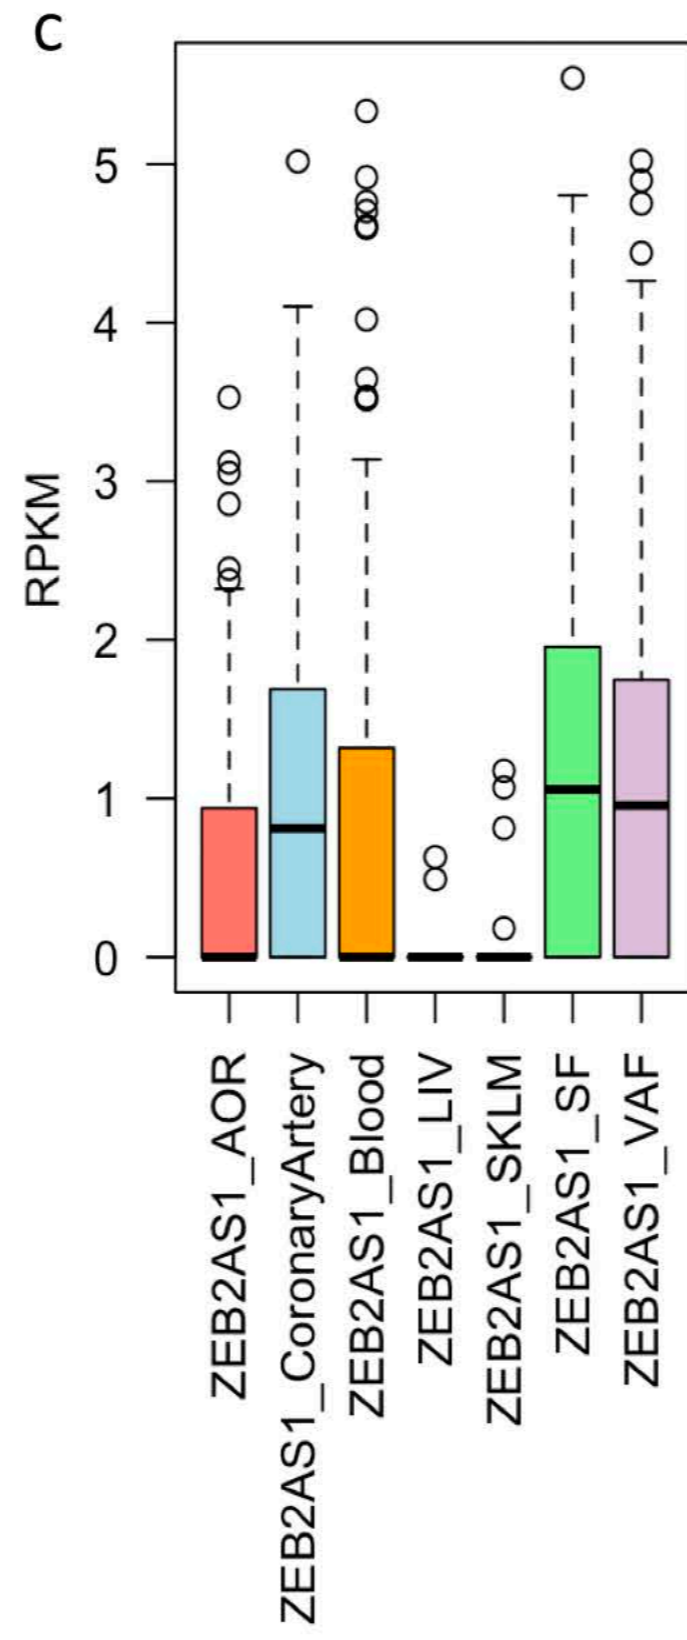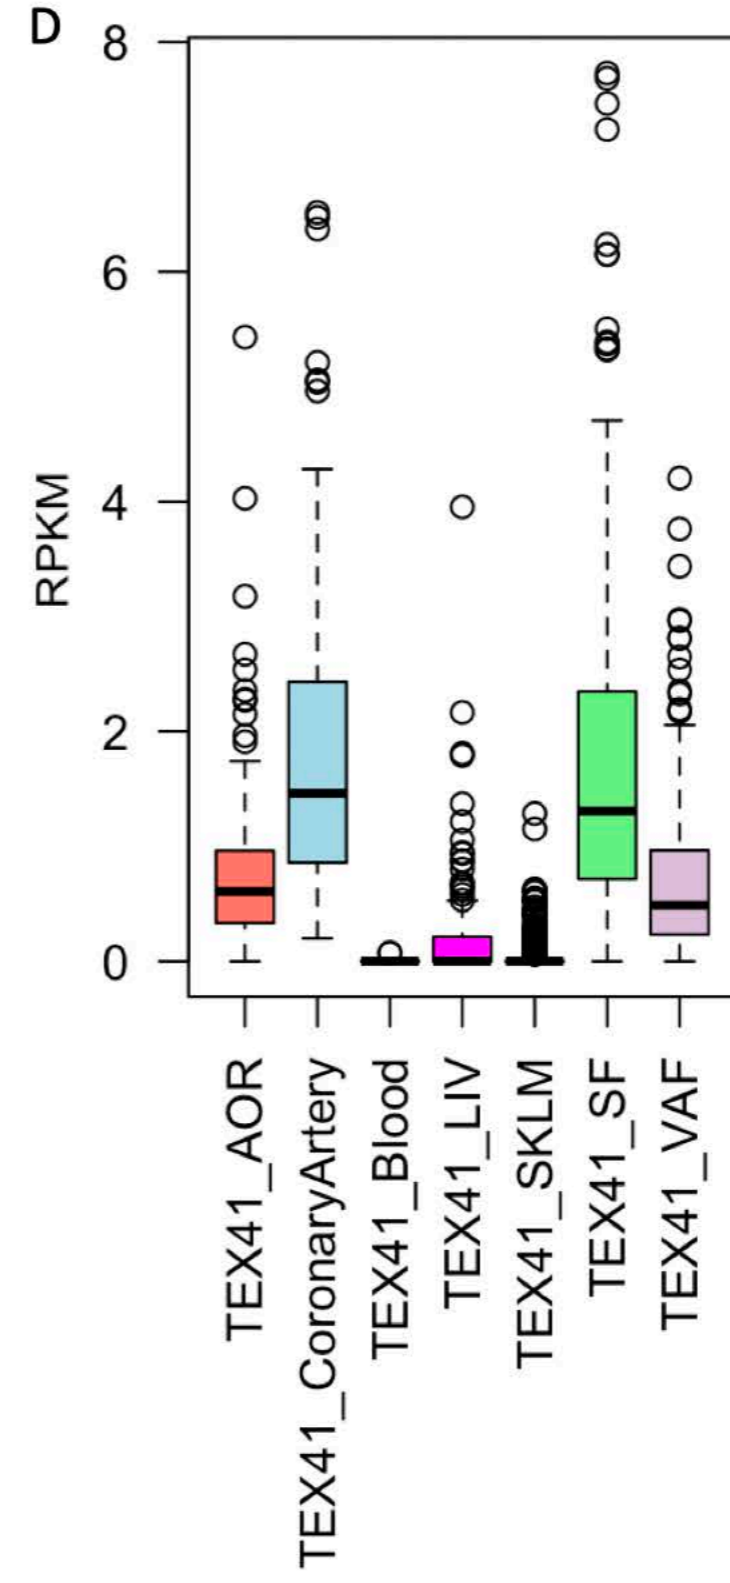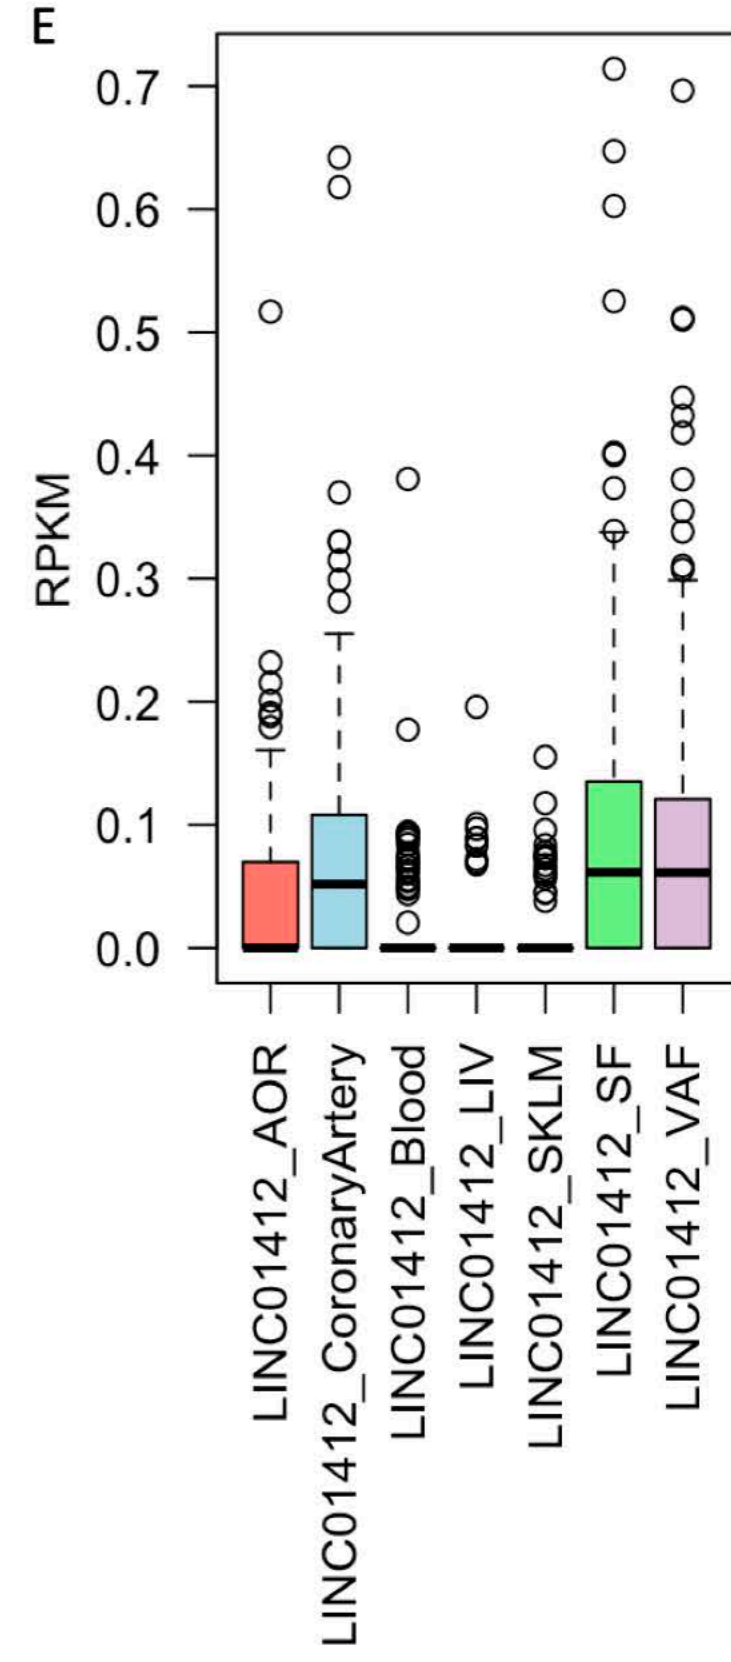

Supplementary Figure 4.

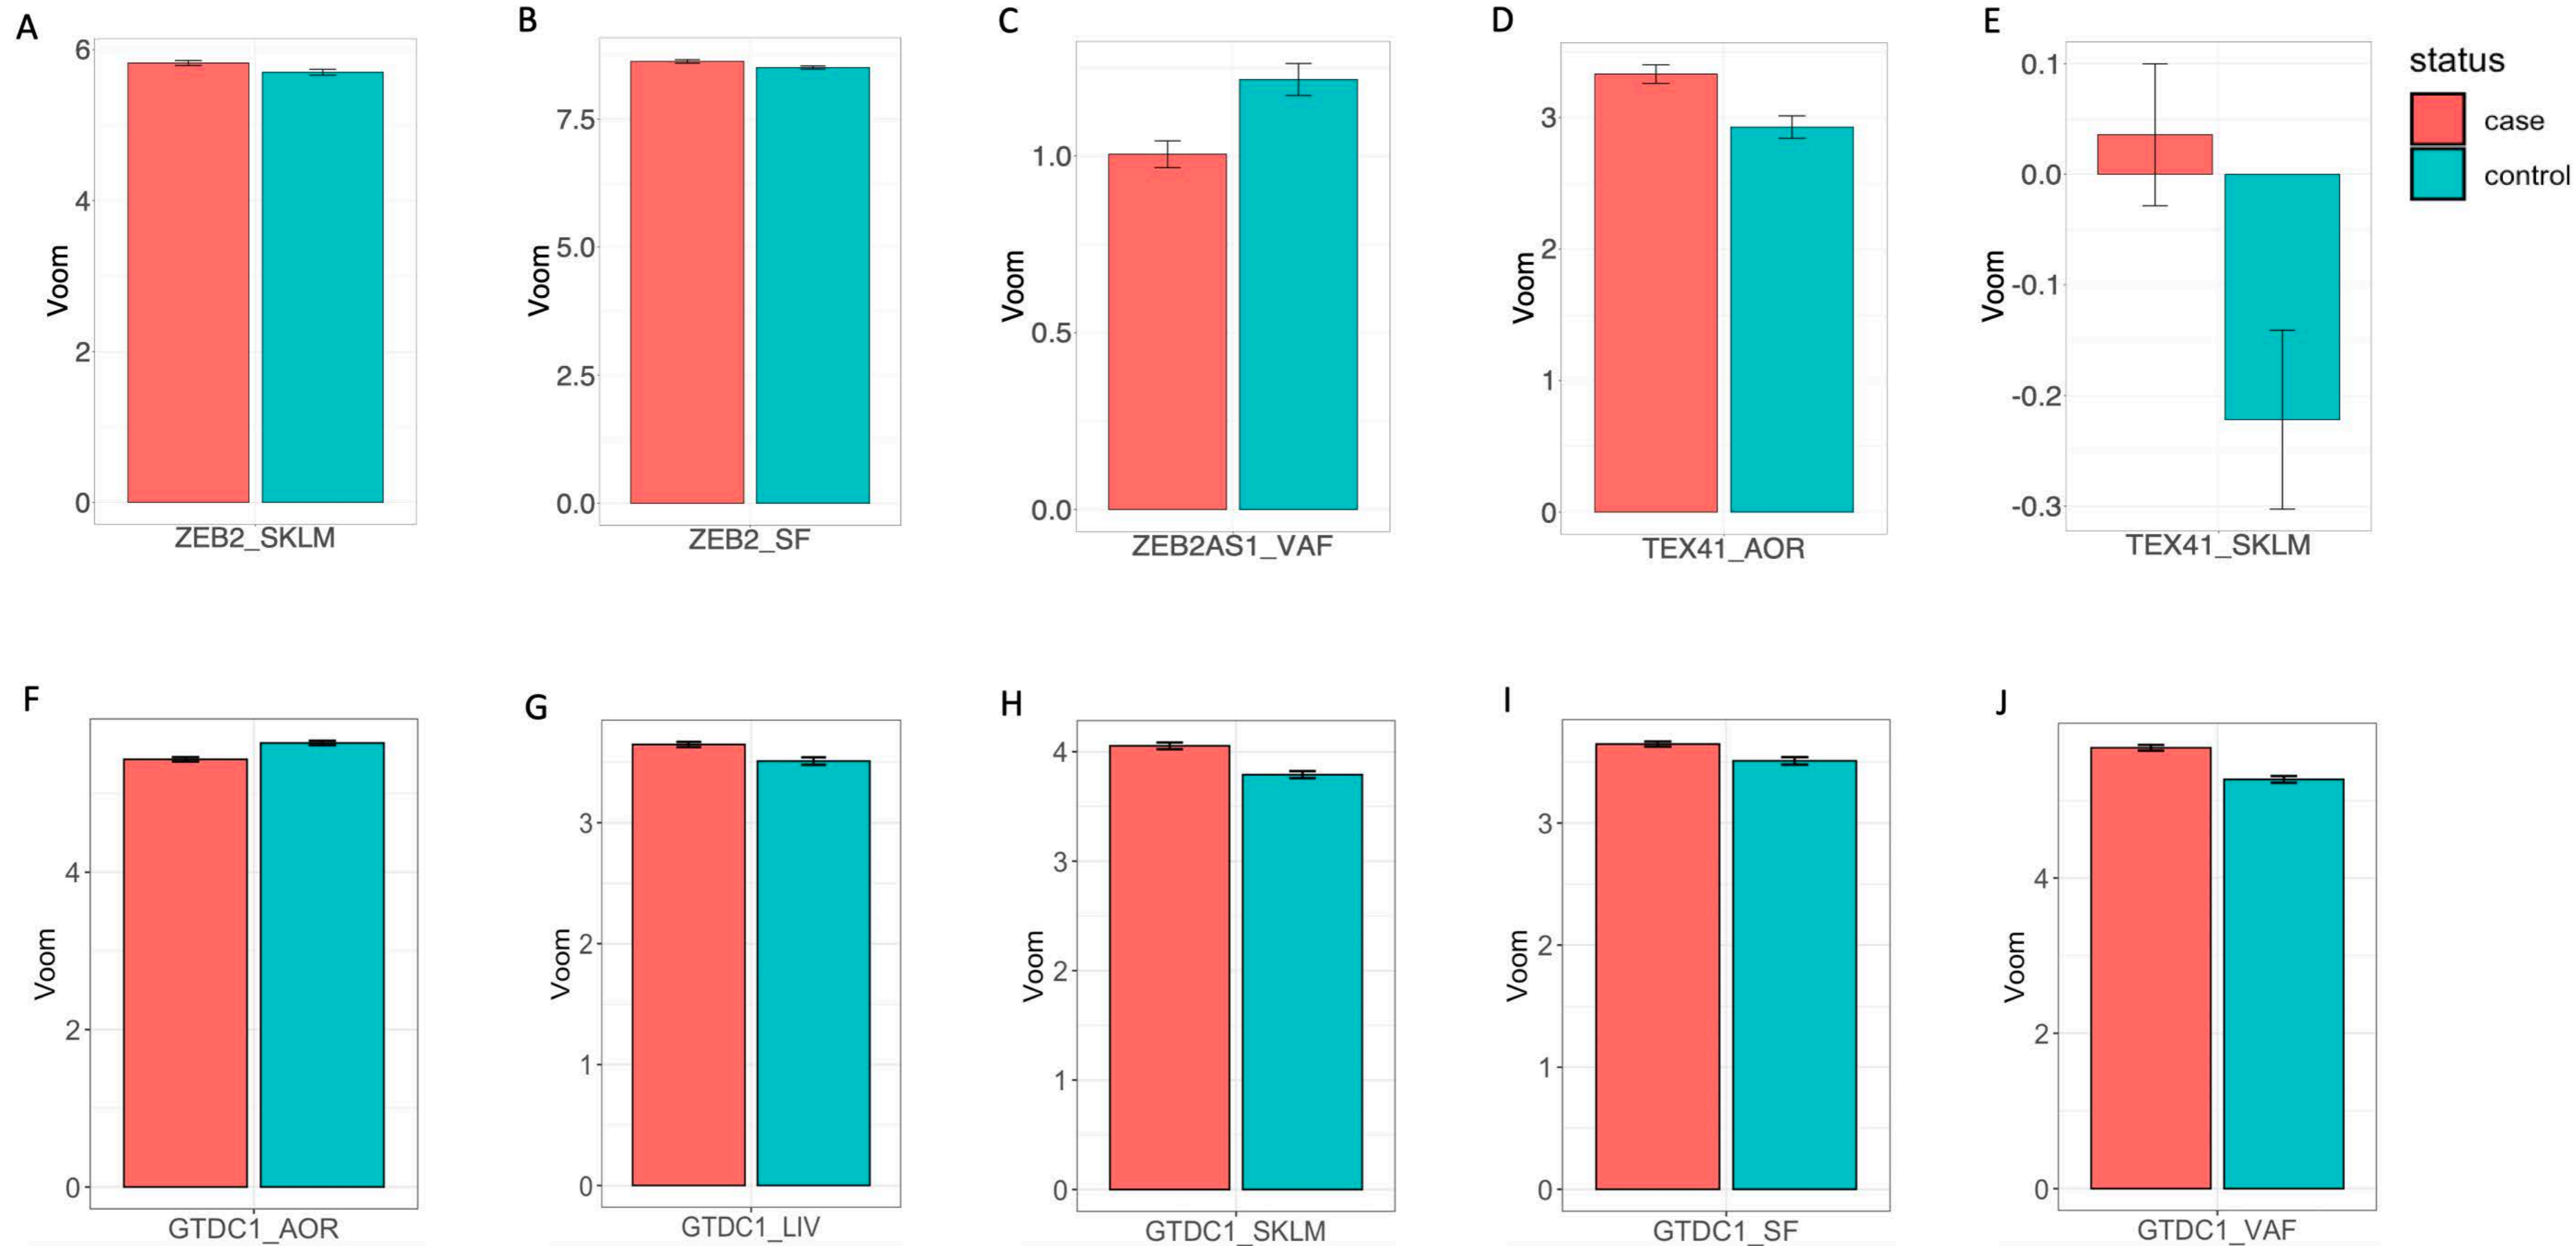

Supplementary Figure 5.

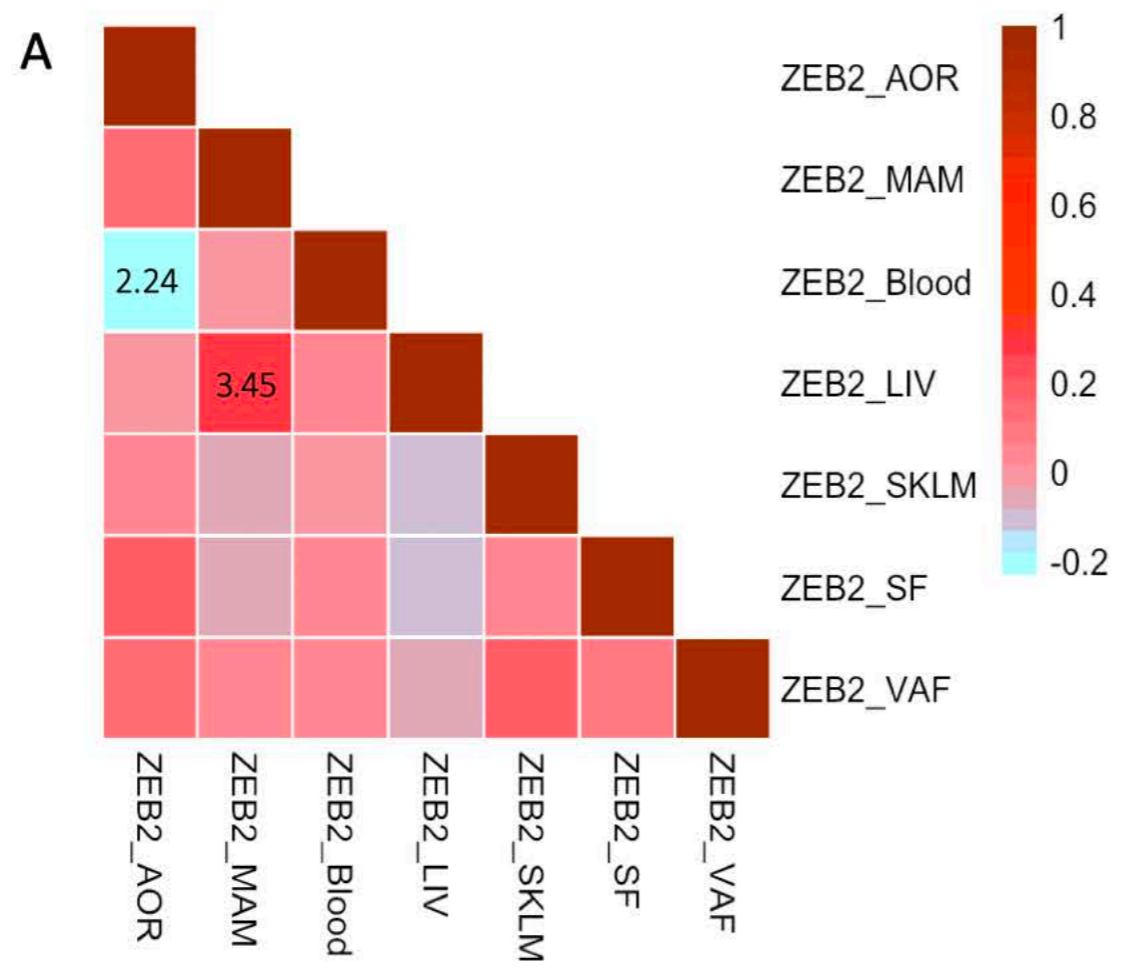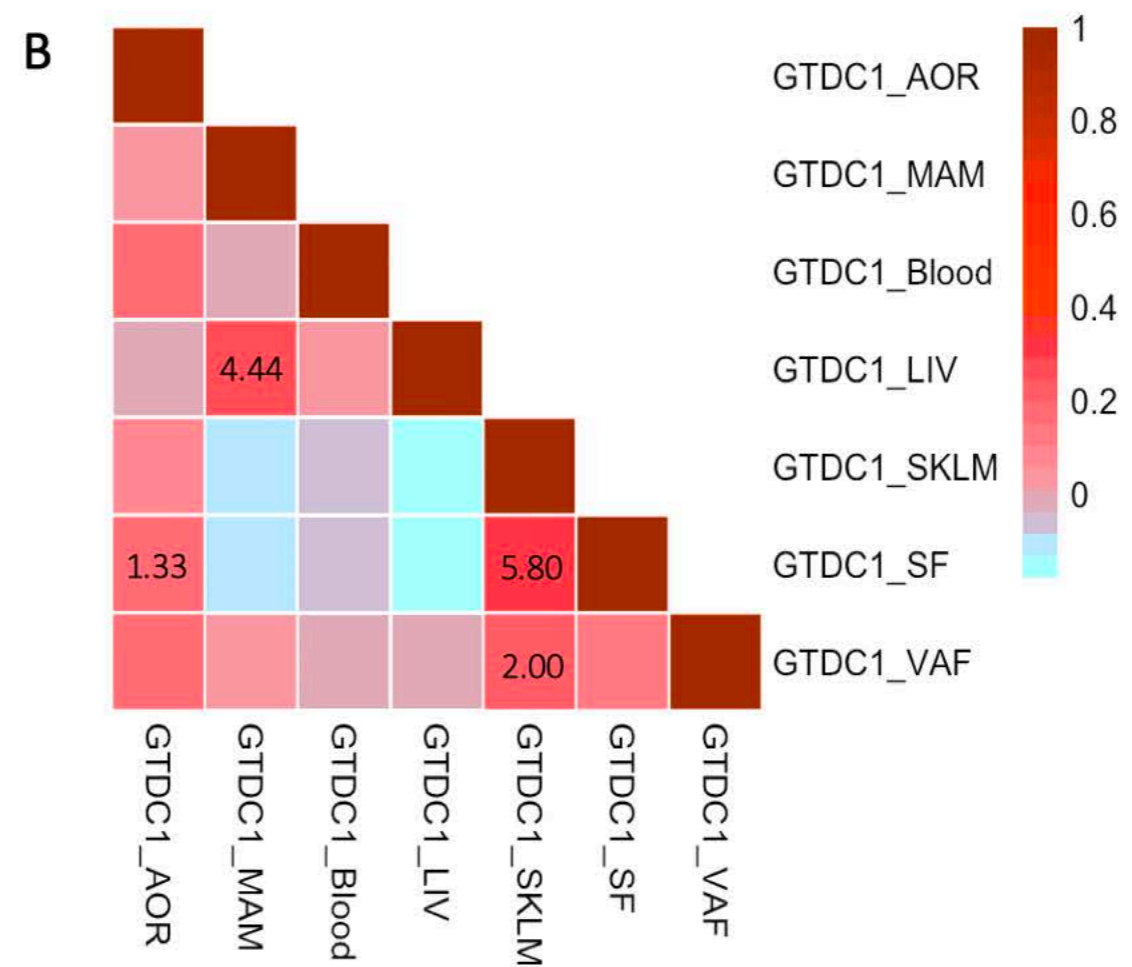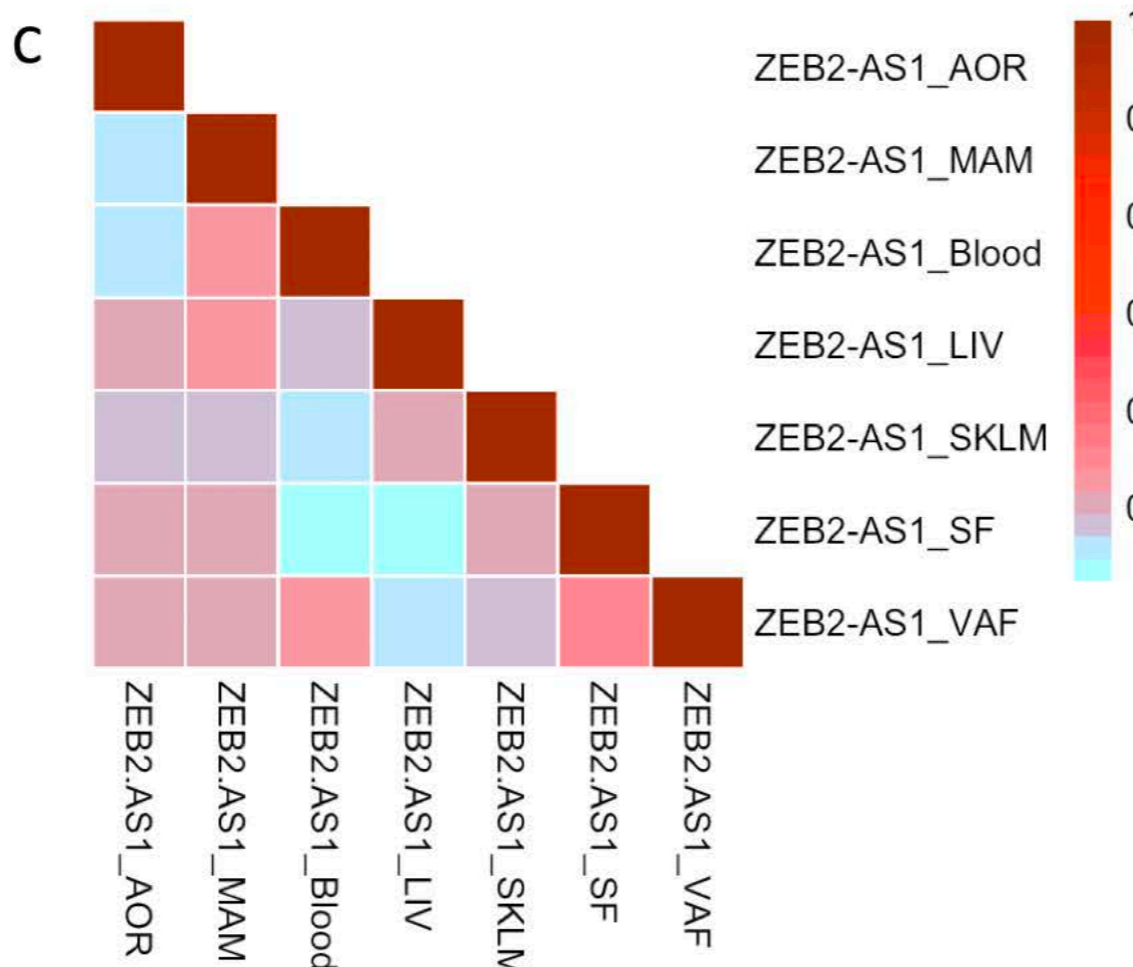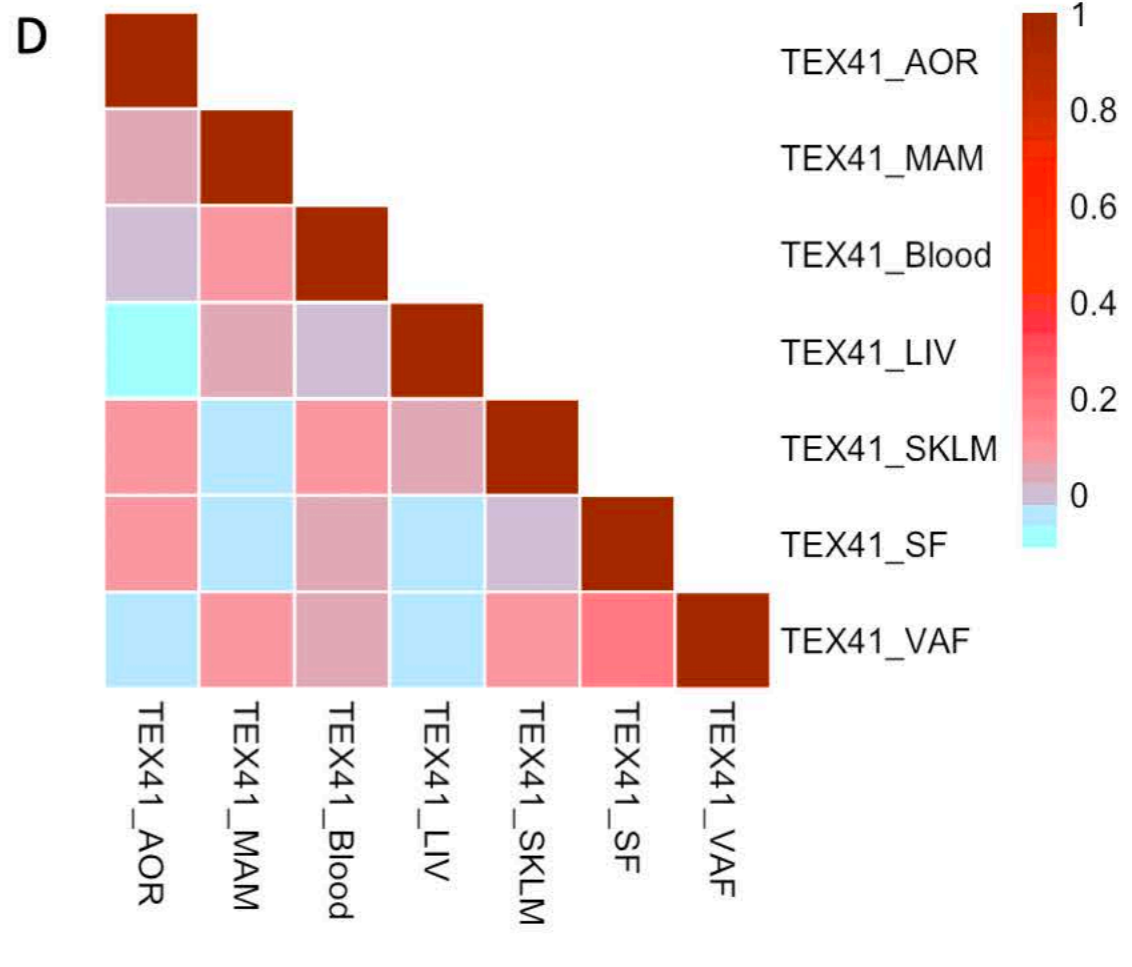

# Supplementary Figure 6.

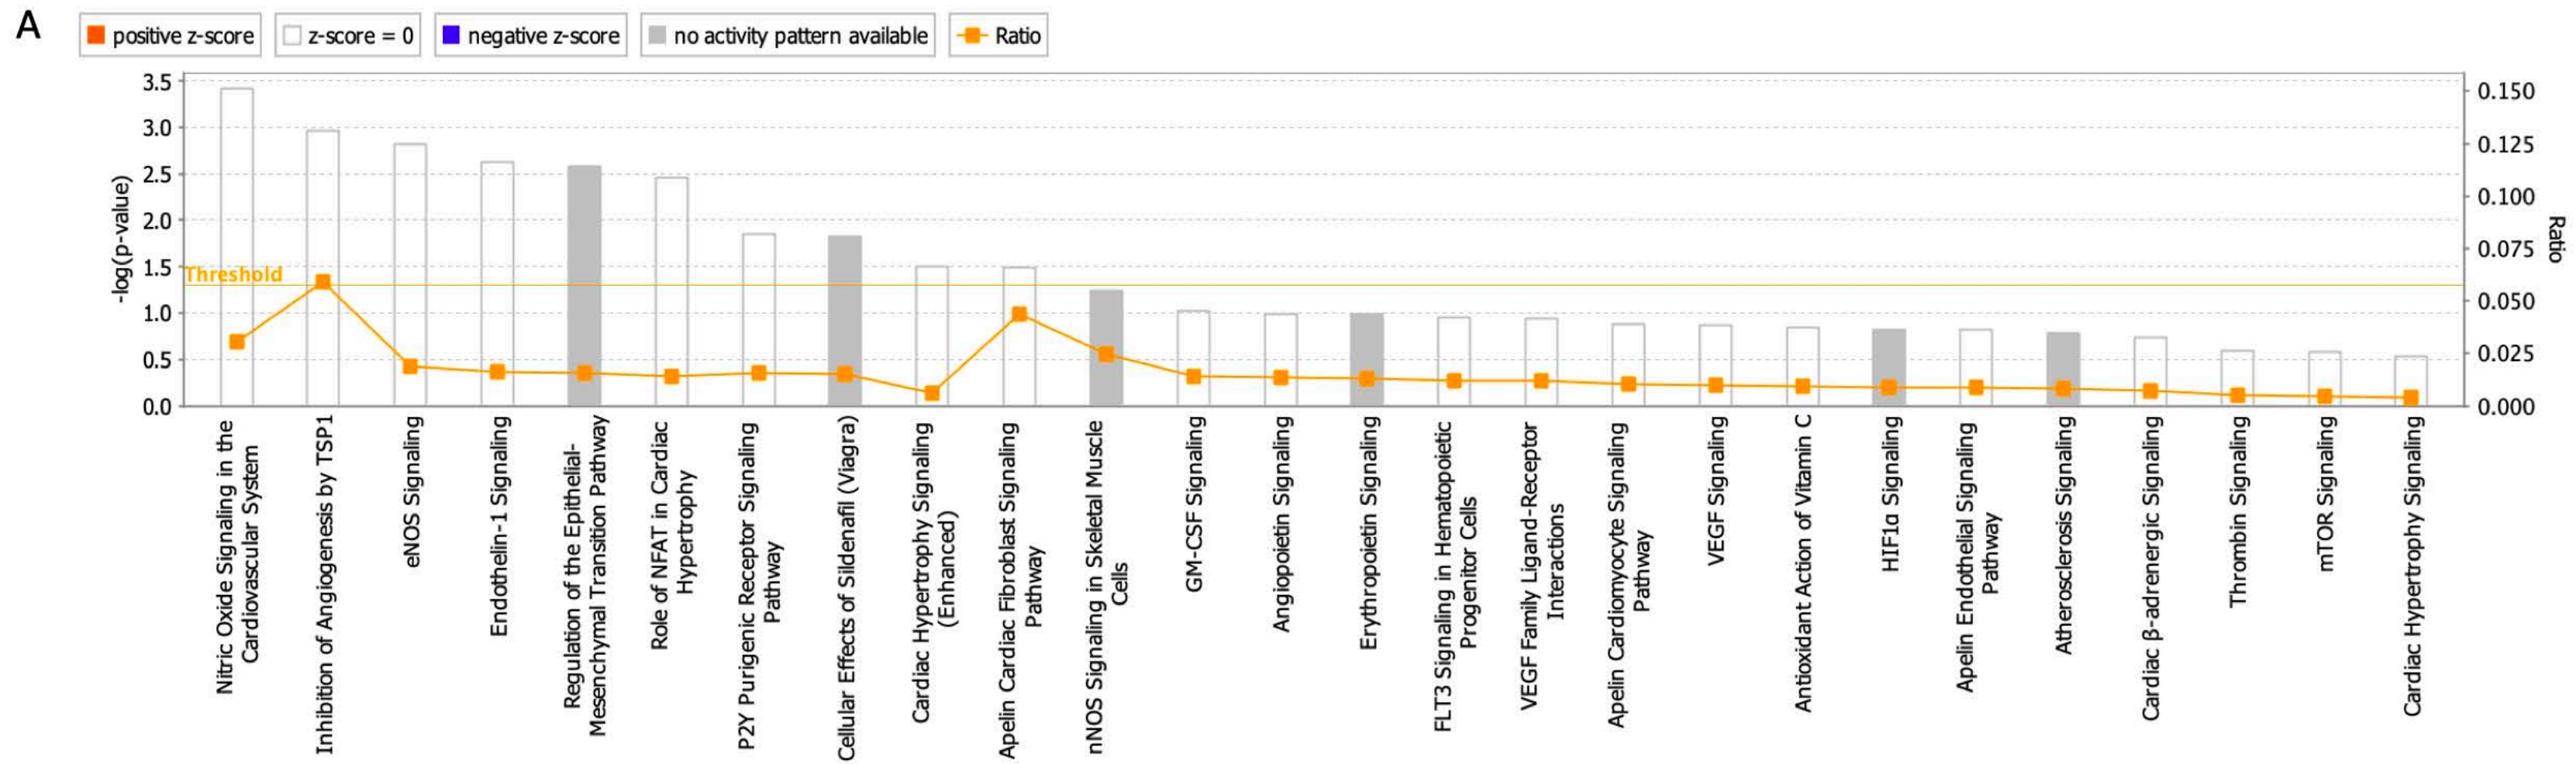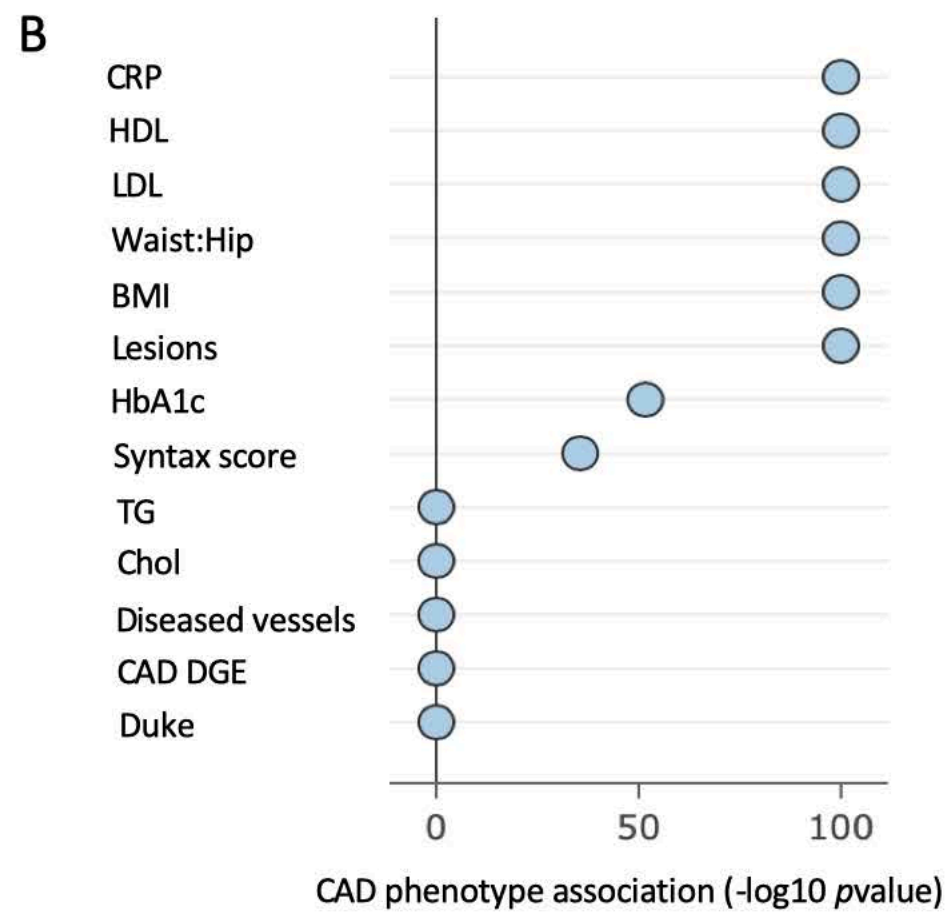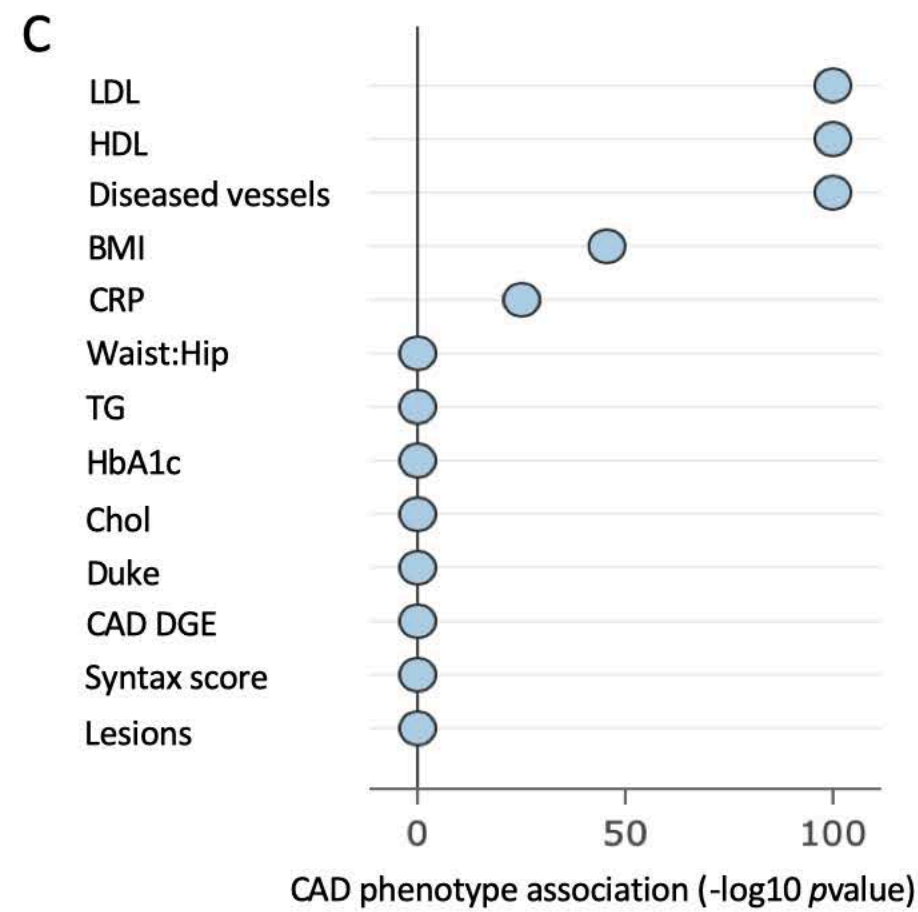

Supplementary Figure 7.

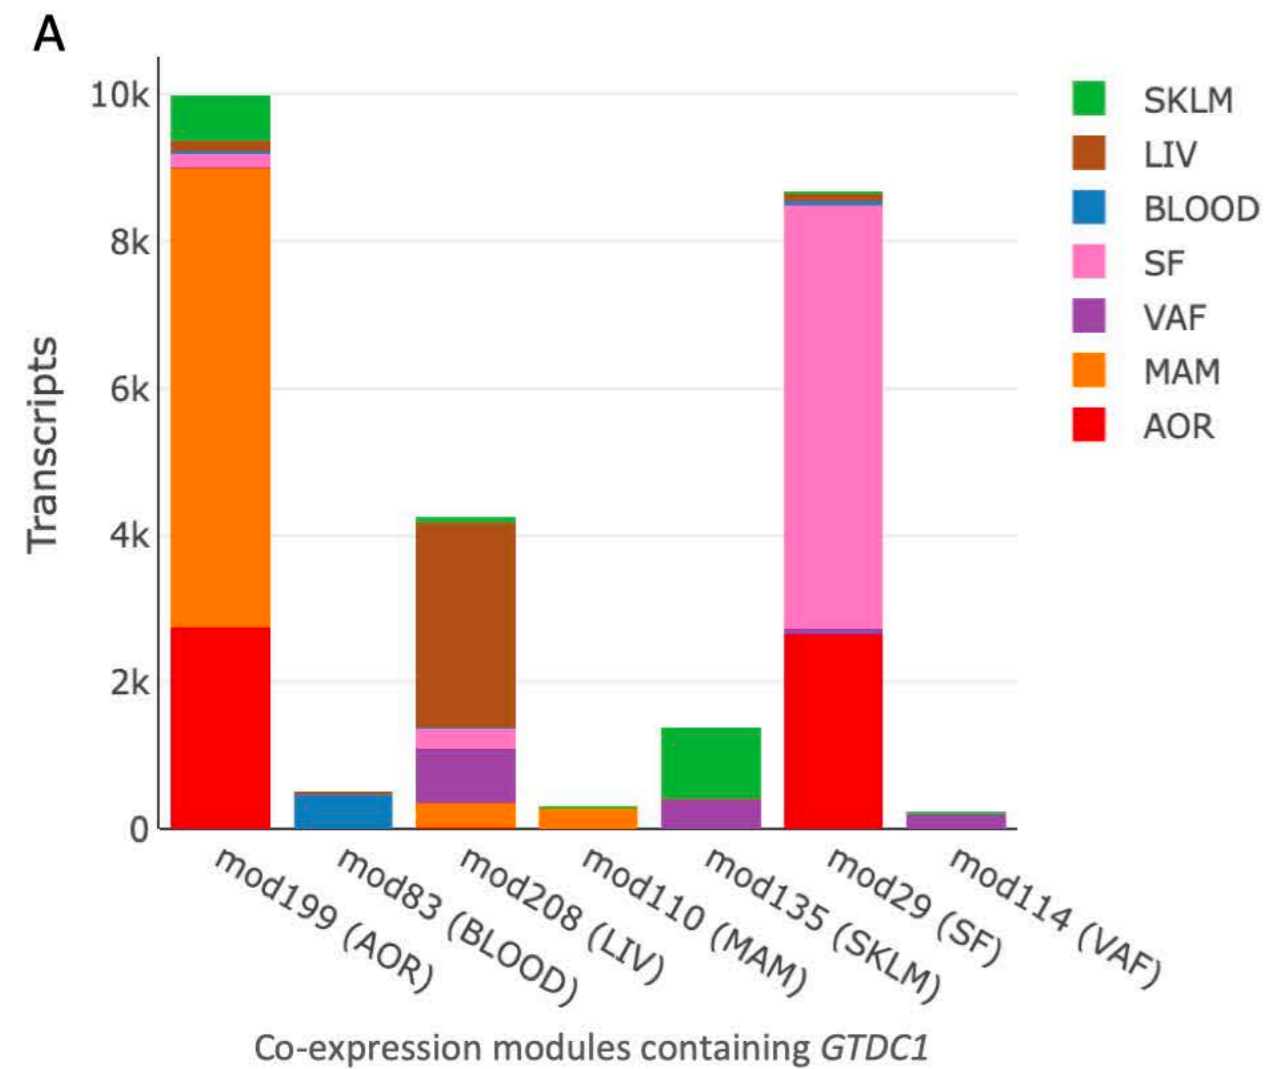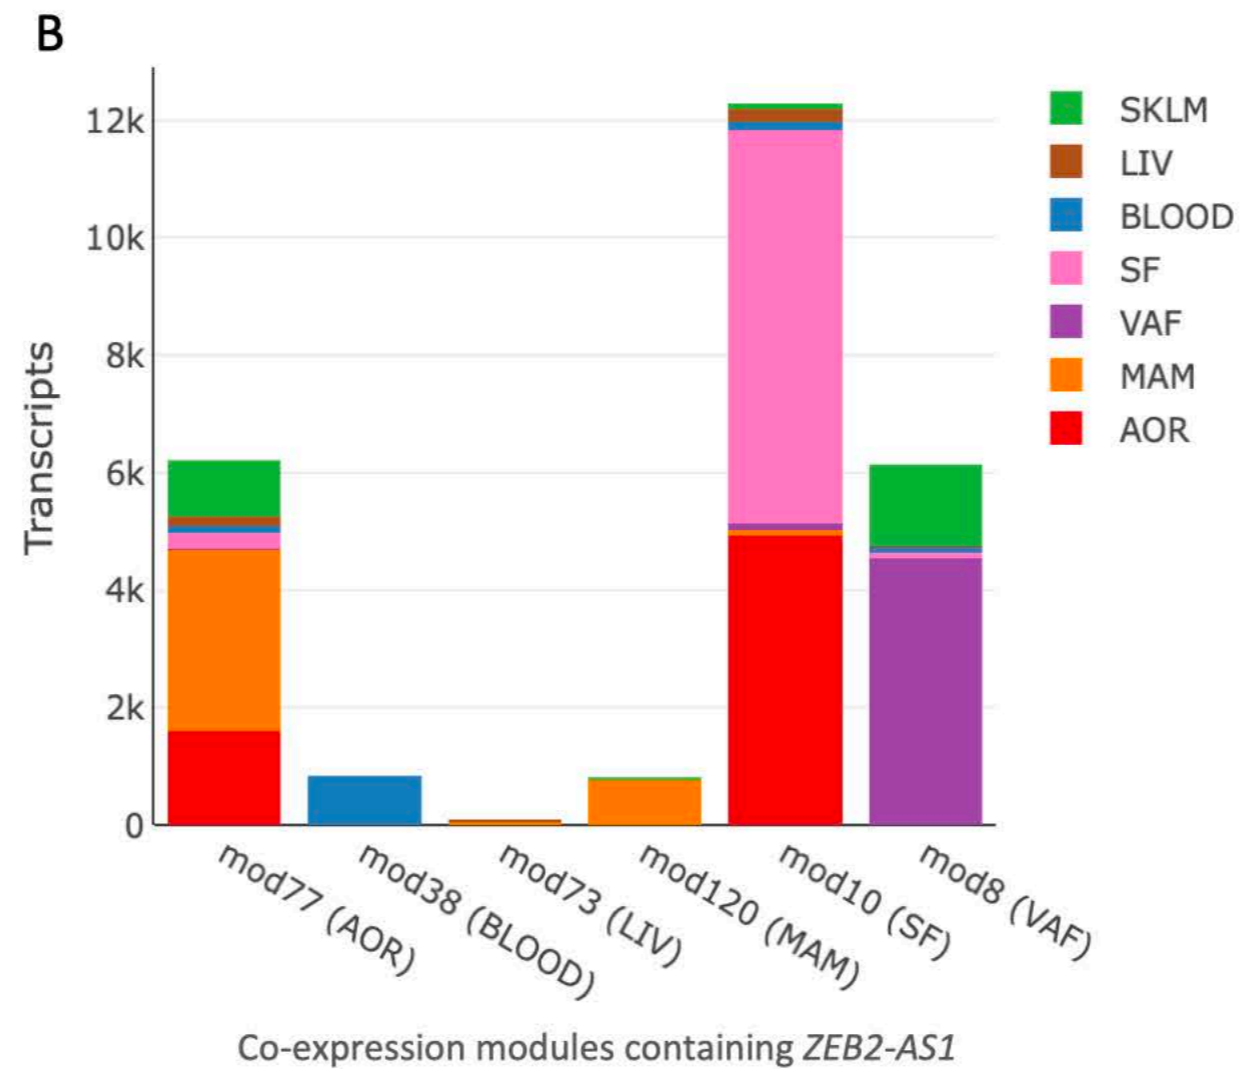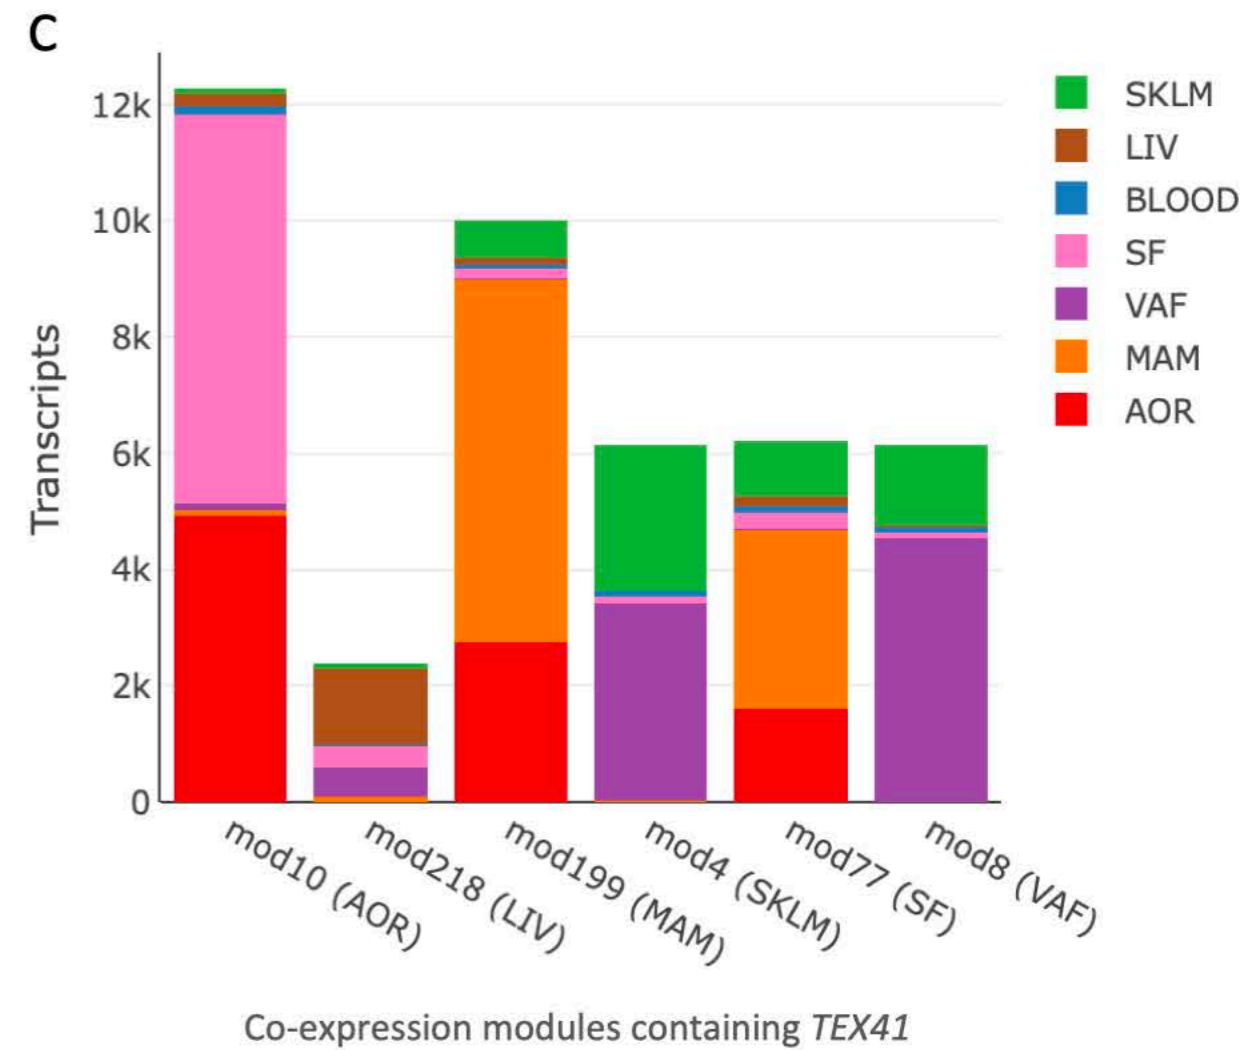

Supplement: NIHMS1626748-supplement-2.pdf [file NIHMS1626748-supplement-2.pdf]
